# Supplementary material
Source: Research Square preprint supplement (doi:10.21203/rs.3.rs-9028687/v1)
Supplement: Supplementary file 2 [file cea79db8114c44a5261b2bf0.docx]

**Supplementary Table 1 Primer sequences in RT-qPCR**

| **Gene** | **Sequence（5'-3'）** |
| --- | --- |
| COL5A1-F | TGCGTCTTCCCTGACAAGAA |
| COL5A1-R | CGTCCACATAGGAGAGCAGTT |
| IGFBP2-F | CATGGGCGAGGGCACTTGT |
| IGFBP2-R | TCATCGCCATTGTCTGCAACC |
| RASL12-F | GAGGTCAACCTGGCCATCC |
| RASL12-R | GCTGTAGGTGTCCTCCAAGT |
| PLCB4-F | AAATAGCGTCAAGAAGGGCCTG |
| PLCB4-R | AAACTTTACAGGCTGGGCGTA |
| GAPDH-F | AGGCCGGATGTGTTCGC |
| GAPDH-R | CAAATCCGTTGACTCCGACC |

**Supplementary Table 2 Binding free energies between key genes and small molecule drugs (kcal/mol).**

| Ligand  Receptor | COL5A1 | IGFBP2 | RASL12 | PLCB4 |
| --- | --- | --- | --- | --- |
| carteolol | -6.535 | -7.927 | -7.336 | -6.432 |
| siguazodan | -7.460 | -6.899 | -7.642 | -7.163 |
| vorinostat | -5.119 | -4.676 | -8.884 | -5.764 |
| dacomitinib | -7.668 | -6.380 | -7.903 | -8.726 |
| BRD-K36796217 | -7.822 | -7.322 | -8.374 | -8.350 |
